# Supplementary material for: Human interleukin-4–treated regulatory macrophages promote epithelial wound healing and reduce colitis in a mouse model
Source: PubMed Central journal article supplement — Sci Adv. 2020 Jun 5;6(23):eaba4376. doi: 10.1126/sciadv.aba4376 (PMC7274799; doi:10.1126/sciadv.aba4376), 2020-06-05
Supplement: aba4376_SM.pdf [file aba4376_SM.pdf]

## Supplementary Materials for

### **Human interleukin-4–treated regulatory macrophages promote epithelial wound healing and reduce colitis in a mouse model**

Timothy S. Jayme, Gabriella Leung, Arthur Wang, Matthew L. Workentine, Sruthi Rajeev, Adam Shute, Blanca E. Callejas, Nicole Mancini, Paul L. Beck, Remo Panaccione, Derek M. McKay\*

\*Corresponding author. Email: [dmckay@ucalgary.ca](mailto:dmckay@ucalgary.ca)

Published 5 June 2020, *Sci. Adv.* **6**, eaba4376 (2020)  
DOI: [10.1126/sciadv.aba4376](https://doi.org/10.1126/sciadv.aba4376)

#### **This PDF file includes:**

Figs. S1 to S7  
Tables S1 to S3

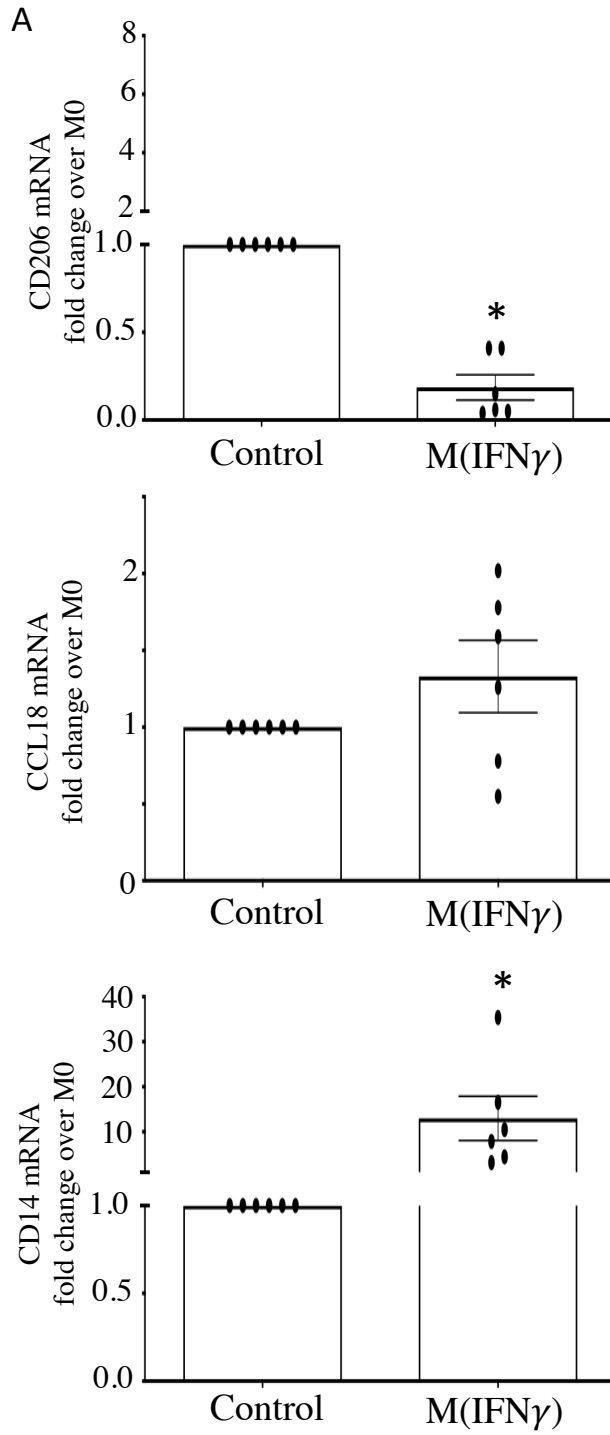

B

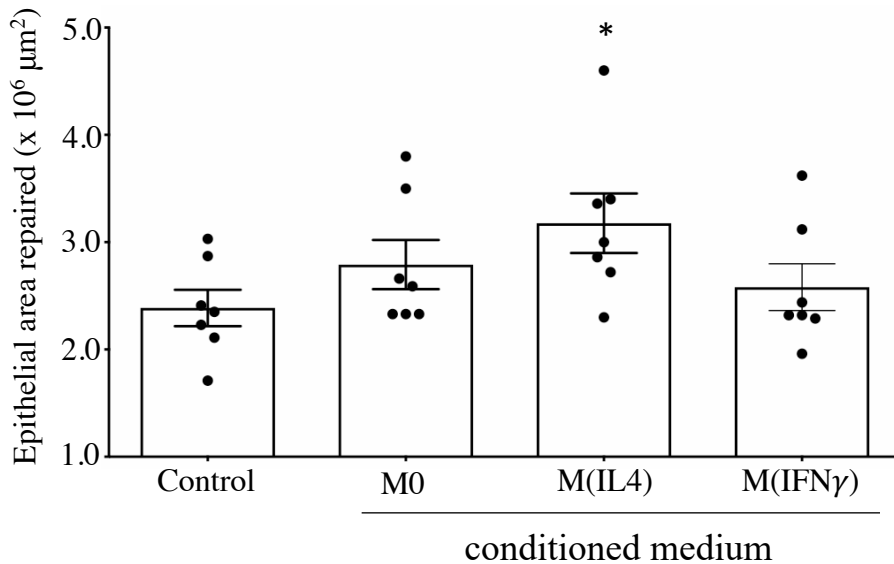

**Supplementary Figure 1: Human IFN $\gamma$  stimulated blood-derived macrophages do not express M(IL4) canonical markers or promote wound healing.** Human blood-derived macrophages were stimulated with IFN $\gamma$  (10 ng/ml; 48 h) and expression of (A) CD206, CCL18, and CD14 mRNA was measured as fold-increase compared to the unstimulated (M0) control (normalized to 1, see methods). Data are mean  $\pm$  SEM; n=5; \*, p<0.05 compared to M(0). (B) Confluent monolayers of the human Caco2 epithelial cell line were mechanically wounded, then received a 50% conditioned medium from M(0), M(IL4) or M(IFN $\gamma$ ). Forty-eight hours later the total area of epithelium from the wound margin was measured. Data are mean  $\pm$  SEM; \*, p<0.05 compared to control (culture medium only) and M(IL4) CM respectively by ANOVA followed by Tukey's test.

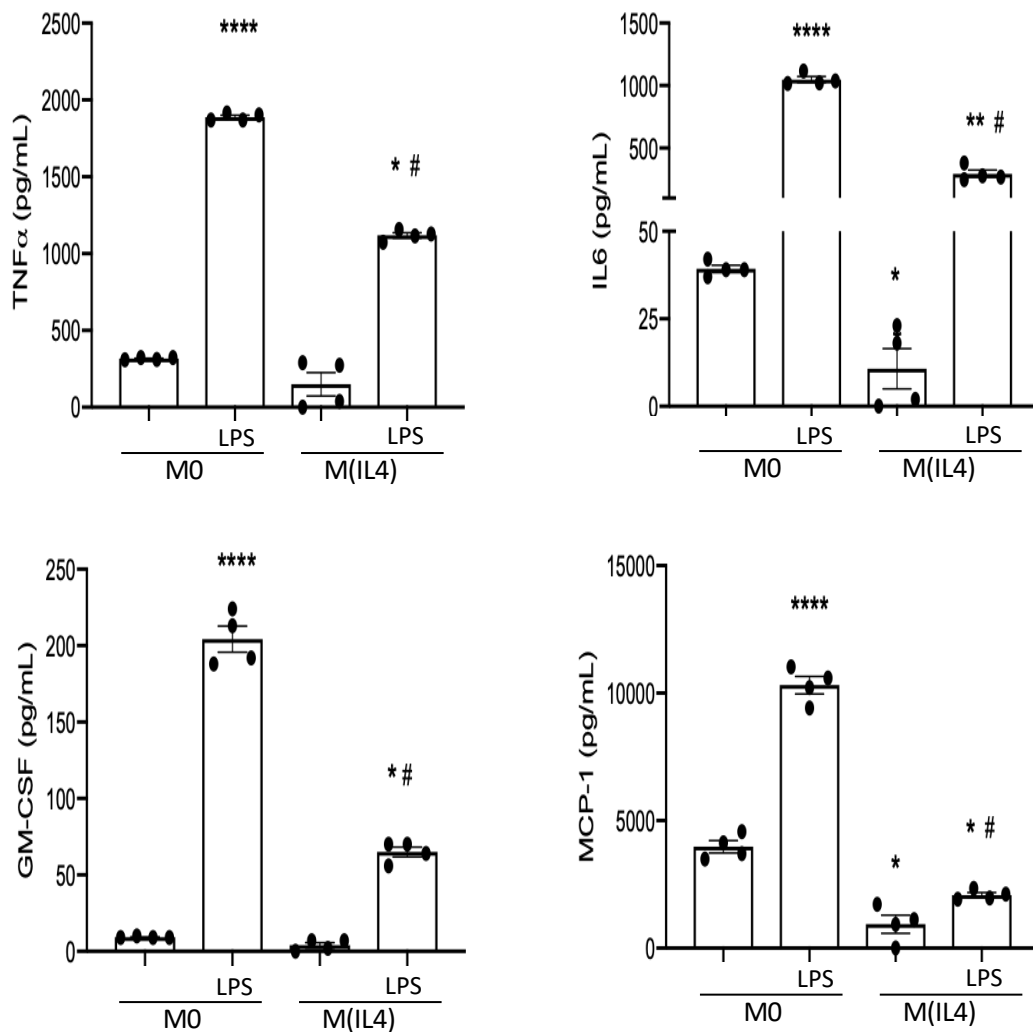

**Supplementary Figure 2: Human M(IL4s) are hypo-responsive to LPS.** Human blood-derived macrophages ( $2.5 \times 10^5$ /ml) were treated with IL-4 (10 ng/ml, 48h) and then challenged with 10 ng/ml LPS and 24h later cell-free supernatants were collected and cytokines assessed in the 13 multi-plex cytokine Luminex array. Non-treated macrophages (M0) served as control (mean  $\pm$  SEM; \*, \*\* and \*\*\*  $p < 0.05$ , 0.01 and 0.001 respectively compared to M0 only; #,  $p < 0.05$  compared to M0-LPS).

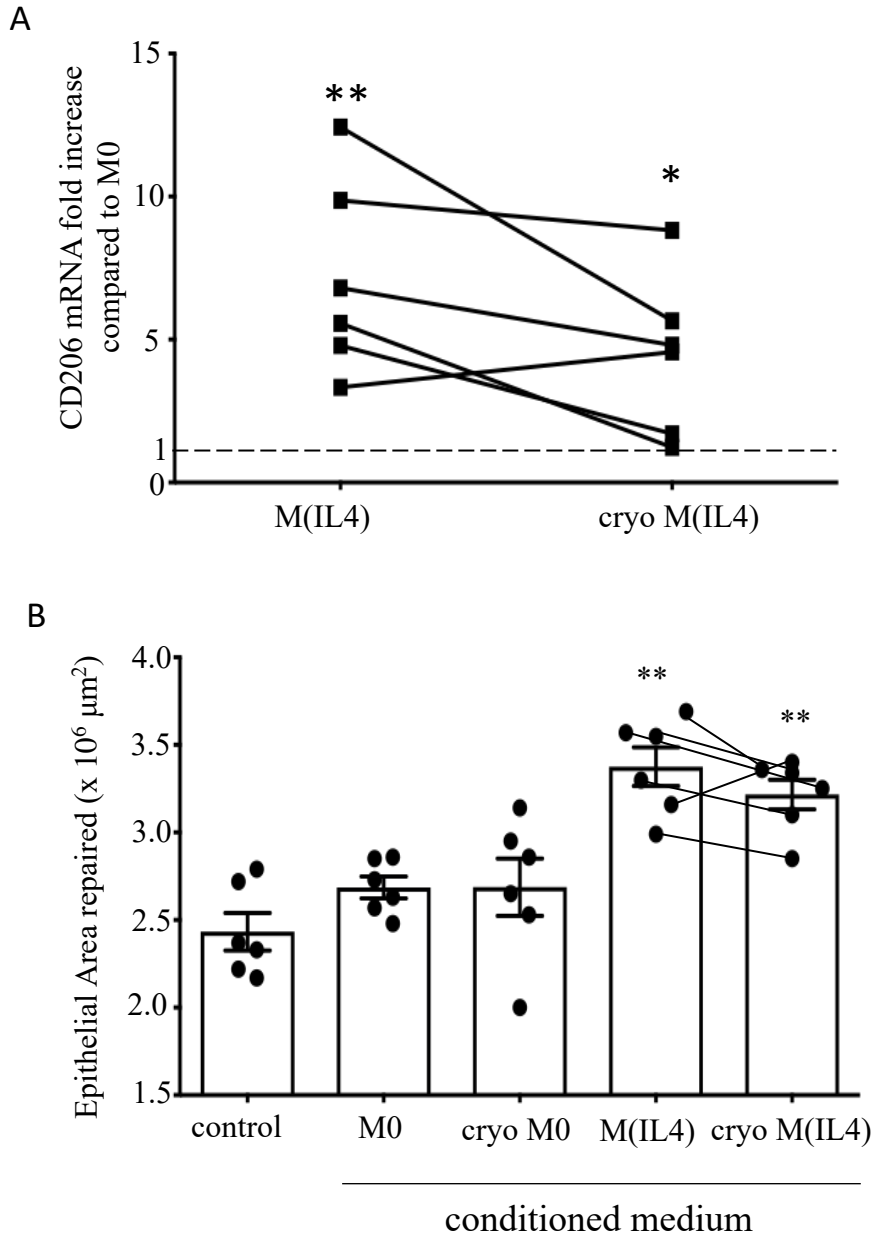

**Supplementary Figure 3: Cryopreserved M(IL4)s maintained phenotype and function.** Human blood-derived macrophages ( $2 \times 10^5/\text{ml}$ ) were converted to M(IL4)s (10 ng/ml IL-4, 48) and then cryopreserved (cryo) in liquid  $\text{N}_2$  for at least 1 week. (A) Cells were retrieved and assessed for phenotype by qPCR for CD206. (B) Conditioned medium (CM) was collected from the cells after 24h of culture and diluted 1:1 in fresh medium and used in the *in vitro* wound healing assay (Caco2 epithelia wounded and exposed to CM for 48h when total epithelial area repaired was measured). Lines connect data from freshly differentiated and cryo M(IL4) from the same healthy blood donor (mean  $\pm$  SEM; \*\*,  $p < 0.05$  compared to M(0); \*  $p < 0.05$  compared to freshly differentiated M(IL4)s).

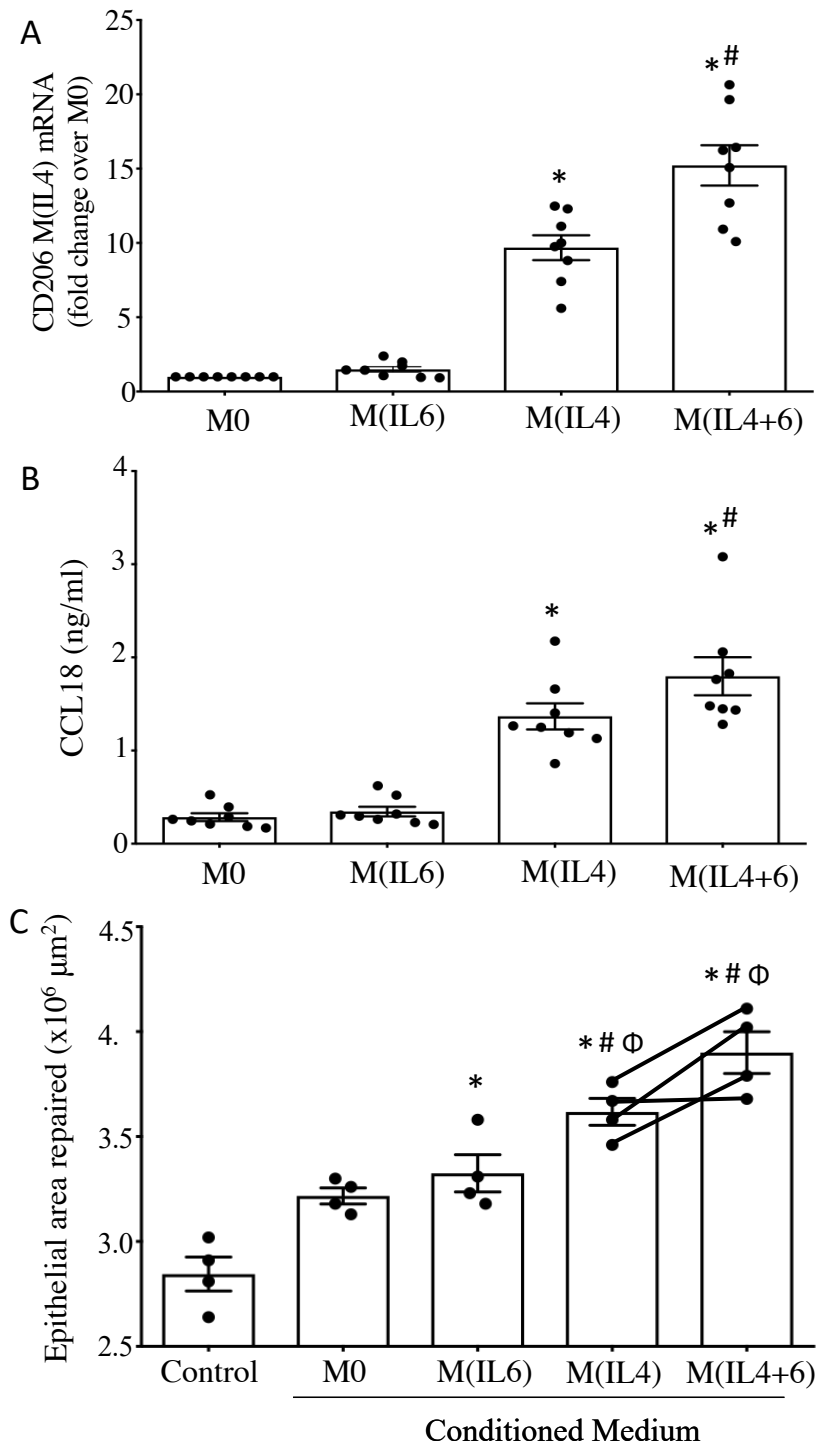

**Supplementary Figure 4: IL-6 enhances the M(IL4) phenotype.** Macrophages derived from blood monocytes of healthy individuals were stimulated with IL-4 (M(IL4)), IL-6 (M(IL6)) or both cytokines (M(IL4+6)) (at 10 ng/ml) for 48h and (A) CD206 mRNA expression assessed and (B) conditioned medium (CM) collected for CCL18 measurement by ELISA (mean  $\pm$  SEM; n=8; \*, #, p<0.05 compared to M0 and M(IL4) respectively by ANOVA followed by Tukey's test). Panel C shows recovery of Caco2 epithelial cell monolayers after mechanical wounding and 24h of exposure to a 50% conditioned medium (CM) from the various cell populations (mean  $\pm$  SEM; n=4; \*, #,  $\Phi$ , p<0.05 compared to control (culture medium only), M0 CM and M(IL6) CM, respectively by ANOVA followed by Tukey's test).

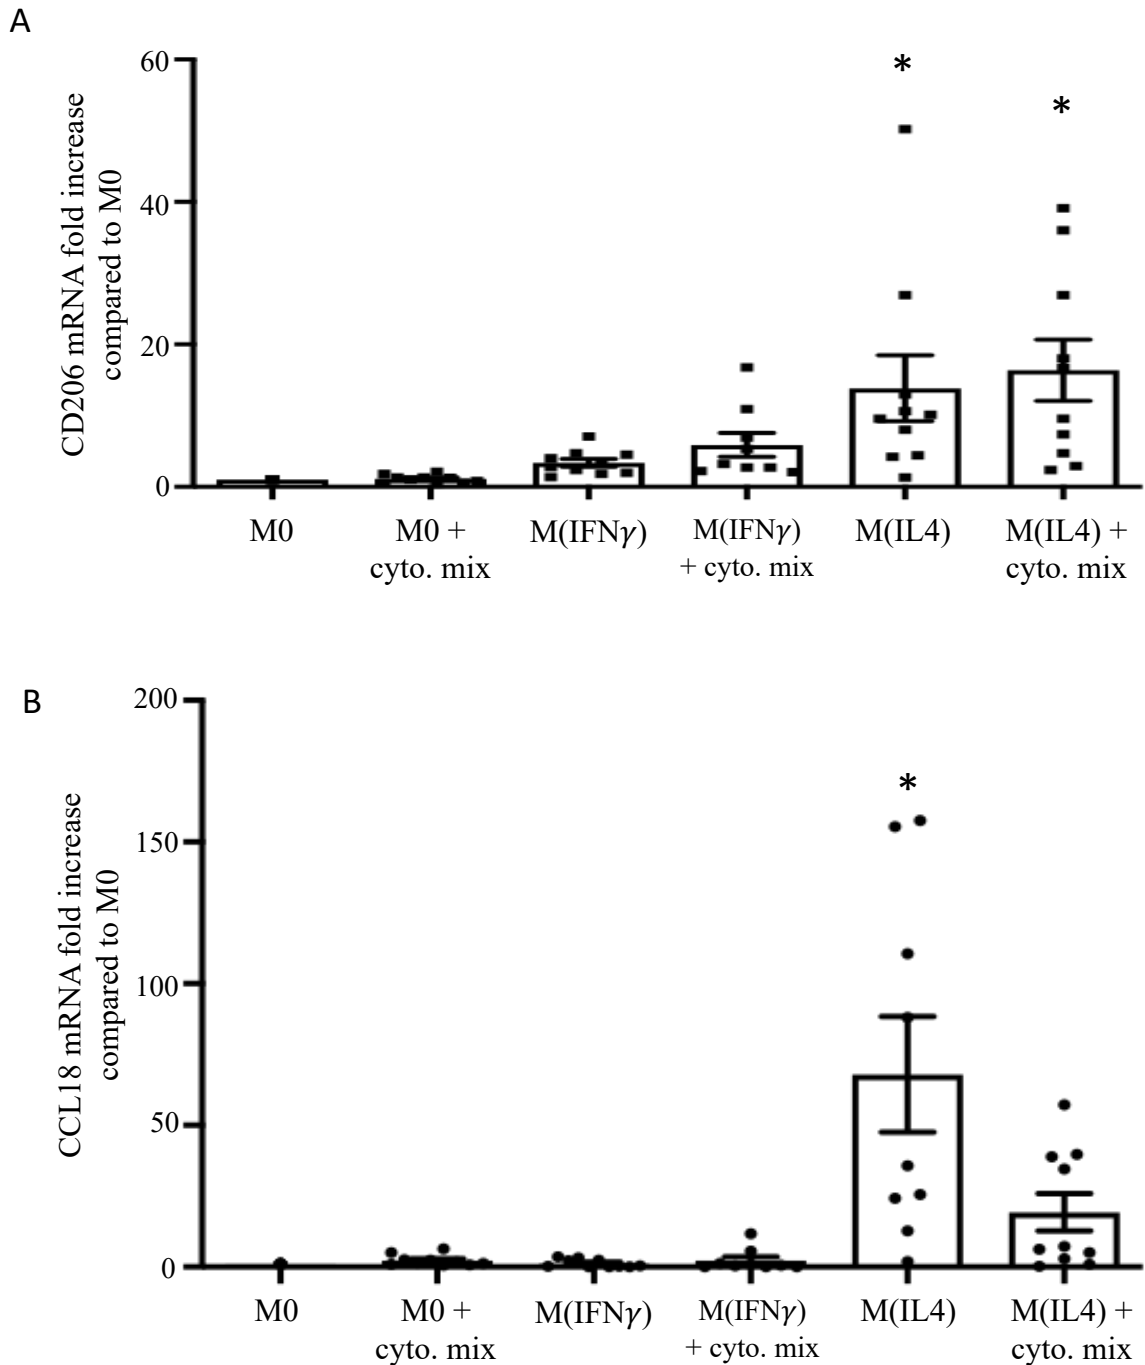

**Supplementary Figure 5: An inflammatory cytokine mixture (cyto. mix) partially reduces the human M(IL-4) phenotype.** A cyto. mix consisting of TNF $\alpha$ , IFN $\gamma$ , and IL-1 $\beta$  (all 10 ng/ml) was applied to monocyte-derived macrophages ( $2 \times 10^5$ ) from healthy donors for 48h. Cells were then rinsed and exposed to IL-4 or IFN $\gamma$  (both 10 ng/ml) for a subsequent 48h, at which point qPCR was performed for (A) CCD206 and (B) CCL18 (mean  $\pm$  SEM; \*,  $p < 0.05$  compare to macrophages only (M0)).

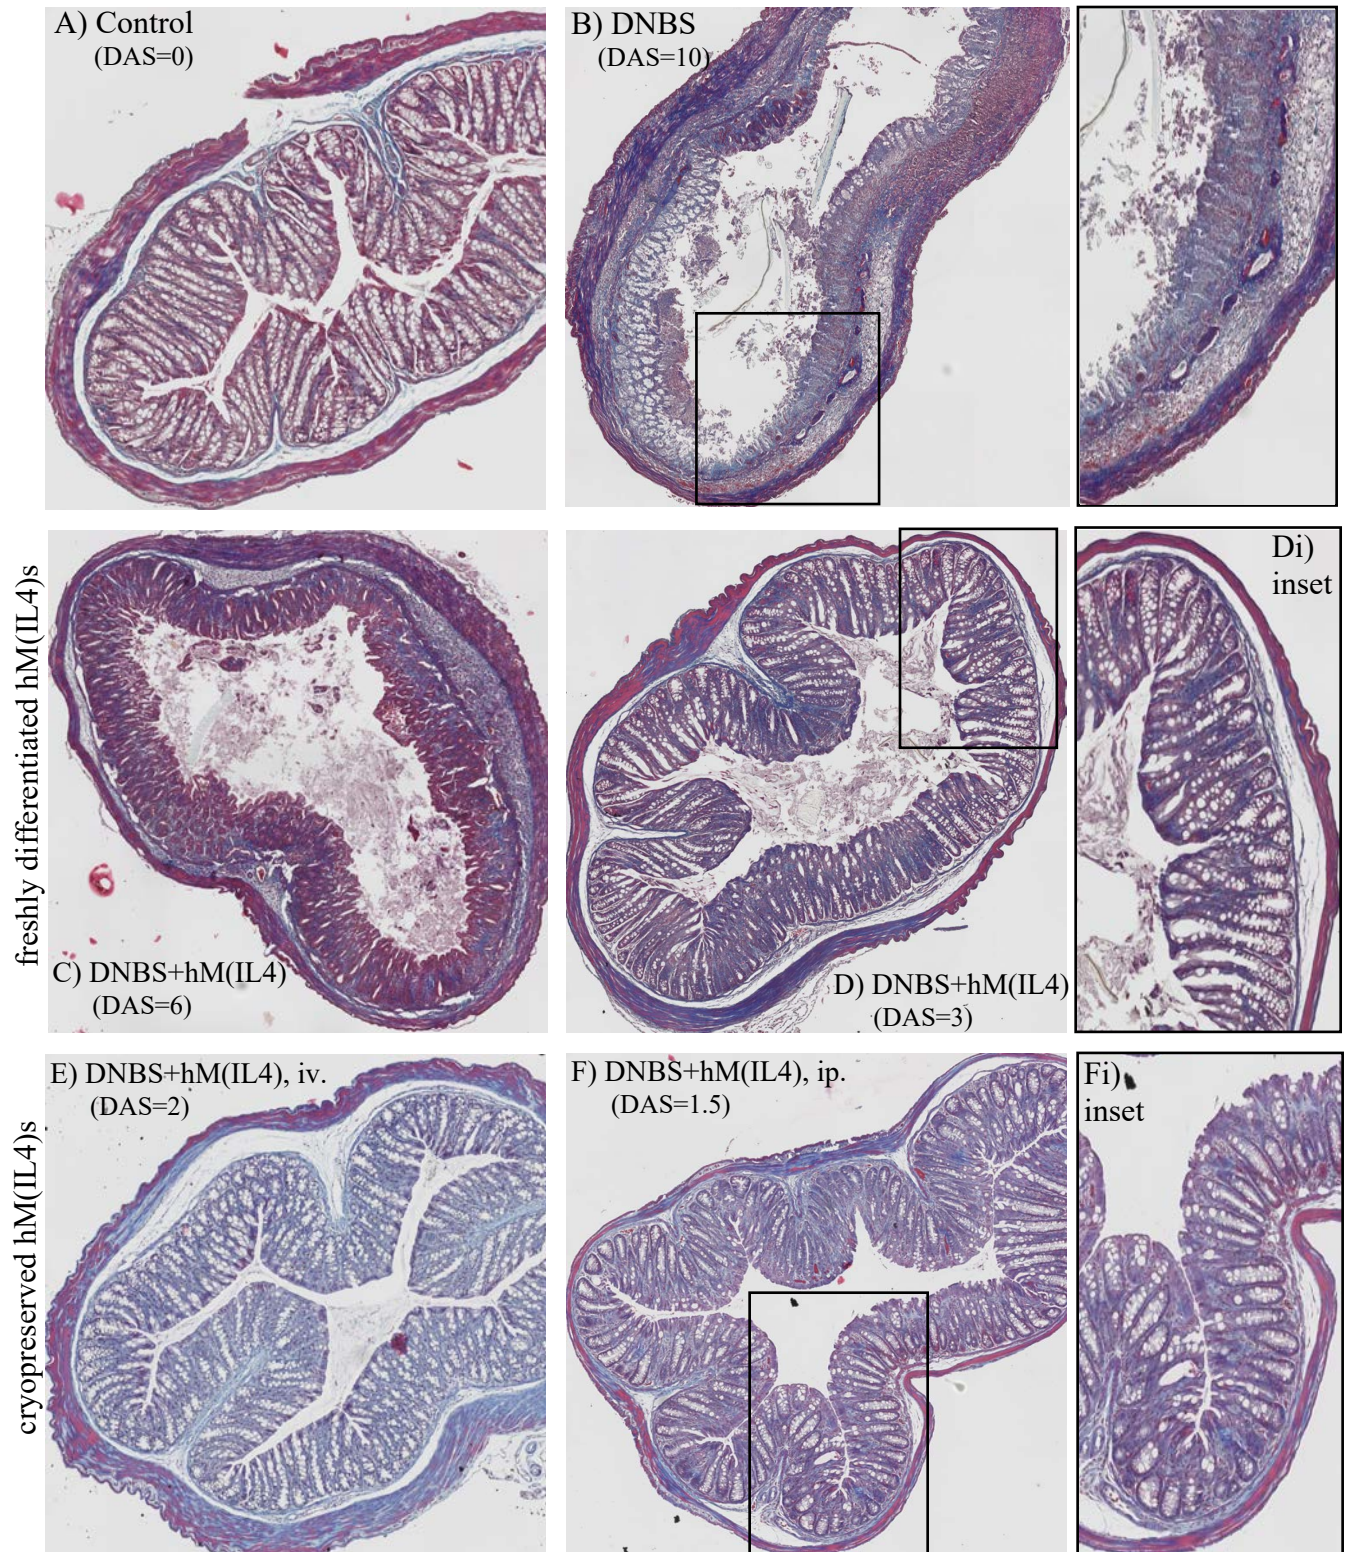

**Supplementary Figure 6: Representative images of colonic histology.** C57/bl6 *Rag1*<sup>-/-</sup> male mice were given  $1 \times 10^6$  freshly differentiated hM(IL4)s (C, D) via intraperitoneal (ip.) injection or cryopreserved hM(IL4)s intravenously (iv.) (E) or ip. (F) and 48h later received DNBS (5mg intra-rectal). Three-days post-DNBS, segments of mid-colon were formalin-fixed and subsequently sections were stained with Masson's Trichrome stain for collagen (DAS, macroscopic disease activity score of mouse from which section was obtained).



A

Control

DNBS

DNBS+M(IL4)

Lung

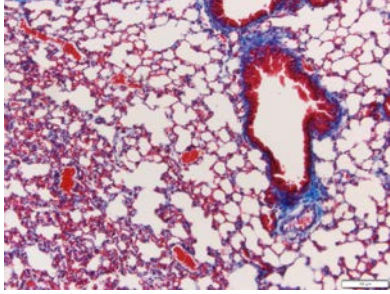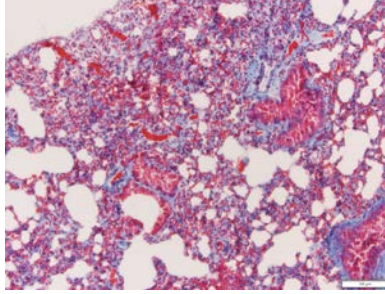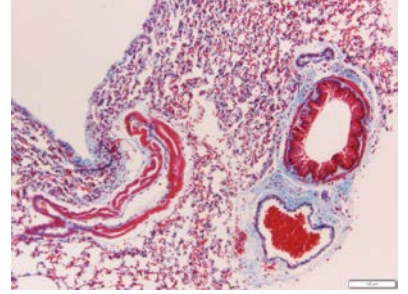

Liver

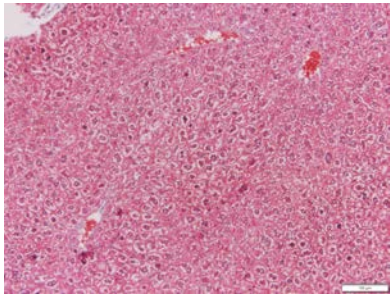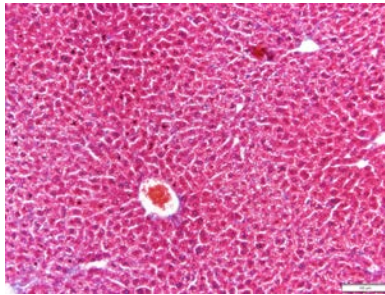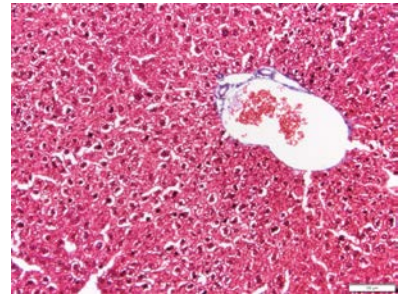

Heart

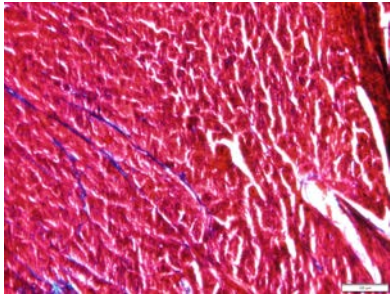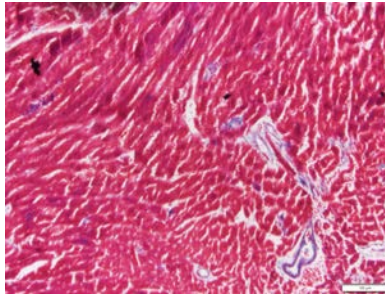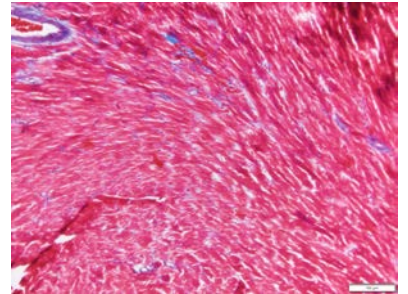

Kidney

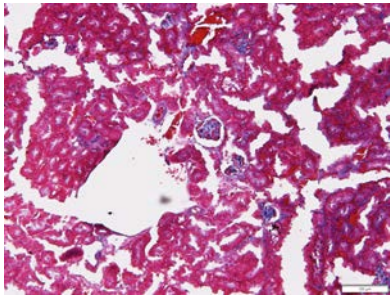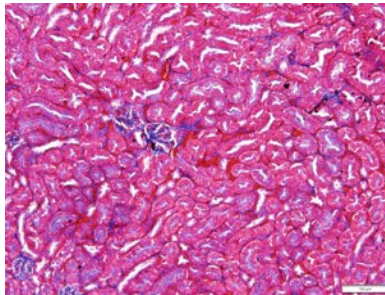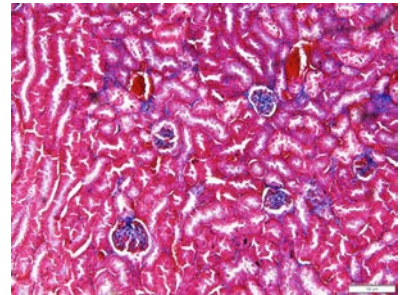

**B**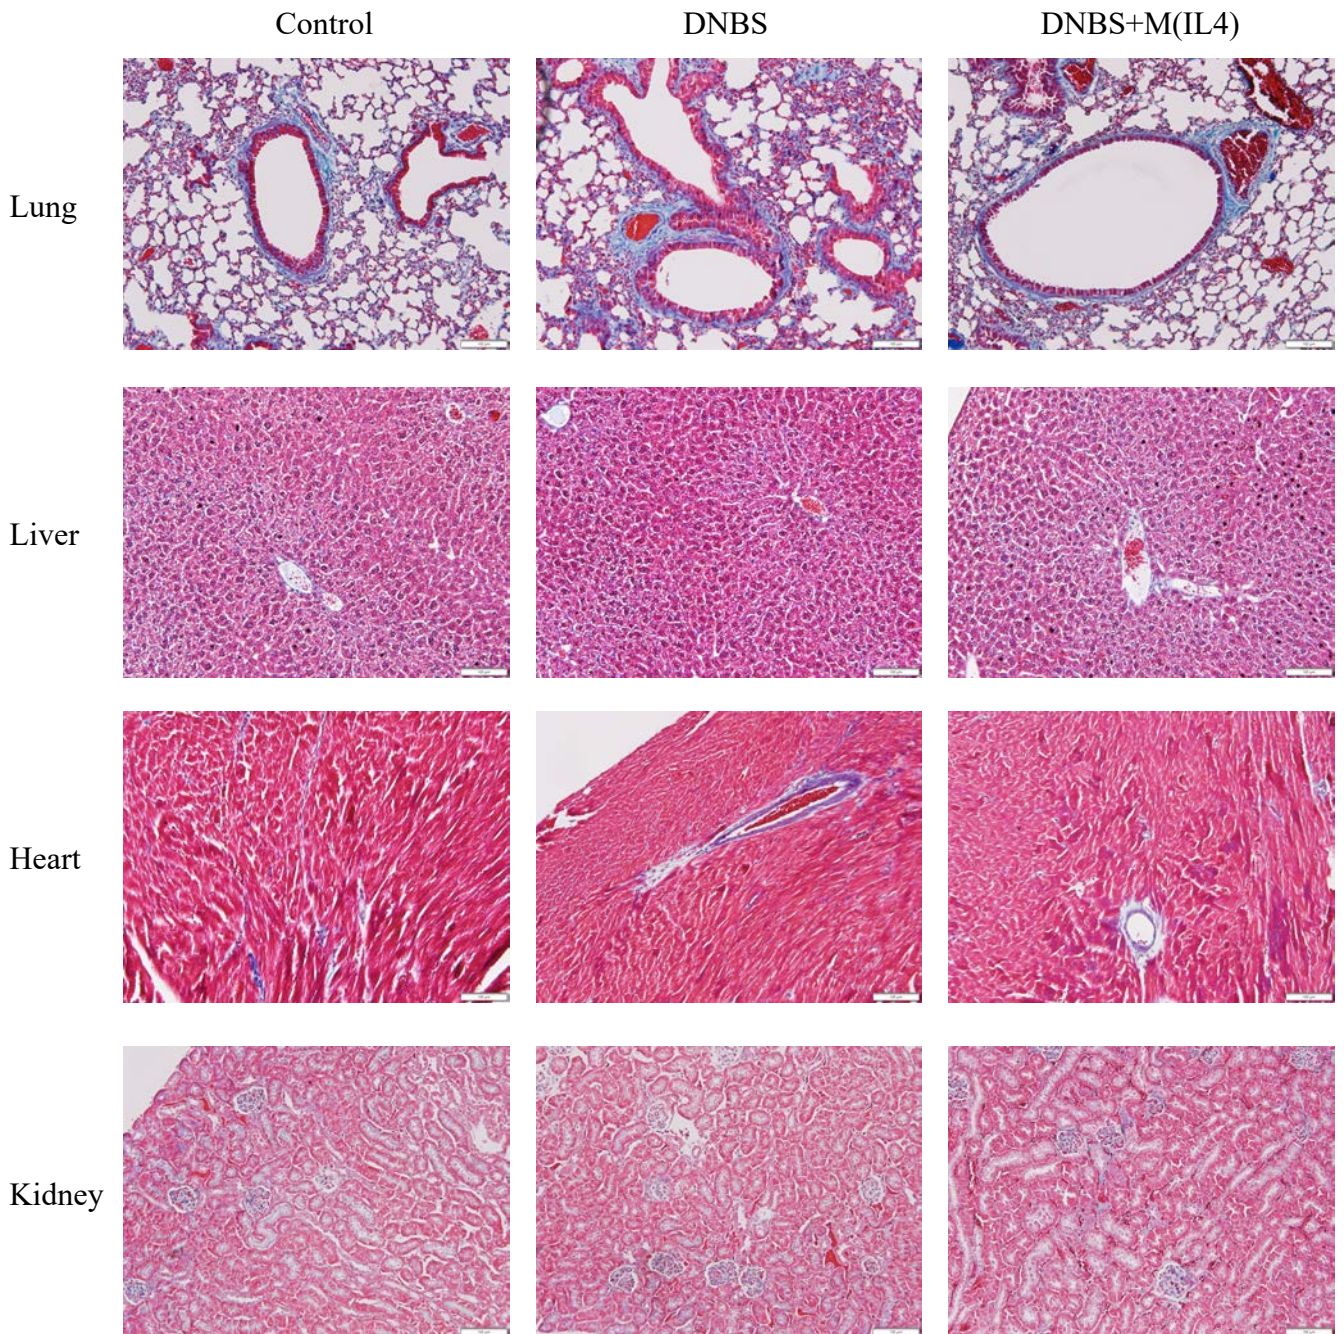

**Supplementary Figure 7: Representative images of liver, lung, heart, and kidney histology of RAG<sup>-/-</sup> mice receiving M(IL4)s for 48h or 1 month prior to DNBS administration.** C57/bl6 *Rag1*<sup>-/-</sup> male mice were given 1x10<sup>6</sup> freshly differentiated hM(IL4s) via intraperitoneal injection (A) 3 days and (B) 1 month later received DNBS (5mg intra-rectal). Three-days post-DNBS, segments of the liver, lung, heart, and kidney were formalin-fixed and subsequently sections were stained with Masson's Trichrome stain for collagen.

**Supplementary Table 1:** Assessment of pro-fibrotic factors in cultured fibroblasts and murine colonic extracts

| (A) <i>In vitro</i> analysis of CC18oc fibroblast responses |                |             |             |  |
|-------------------------------------------------------------|----------------|-------------|-------------|--|
| Parameter \ condition                                       | Culture medium | M(0) CM     | M(IL4) CM)  |  |
| cell count (x10 <sup>5</sup> )                              | 2.62 ± 0.05    | 2.60 ± 0.03 | 2.64 ± 0.04 |  |
| total protein of cells (ng/ml)                              | 412 ± 13       | 554 ± 37    | 688 ± 68*   |  |
| prolyl-4-hydrolase mRNA <sup>#</sup>                        | 1              | 1.0 ± 0.2   | 1.1 ± 0.2   |  |
| α-smooth muscle actin mRNA <sup>#</sup>                     | 1              | 0.7 ± 0.1   | 1.0 ± 0.1   |  |
| n                                                           | 6              | 6           | 6           |  |

  

| (B) Analysis of C57/BL6 <i>Rag1</i> <sup>-/-</sup> mouse colonic tissue |           |            |                    |                    |
|-------------------------------------------------------------------------|-----------|------------|--------------------|--------------------|
| Parameter \ condition                                                   | control   | DNBS       | DNBS + hM(IL4) ip. | DNBS + hM(IL4) iv. |
| prolyl-4-hydrolase mRNA <sup>†</sup>                                    | 1.0 ± 0.4 | 0.7 ± 0.3  | 0.5 ± 0.3          | 0.5 ± 0.3          |
| α-smooth muscle actin mRNA <sup>†</sup>                                 | 1.0 ± 0.3 | 0.6 ± 0.2  | 0.5 ± 0.1          | 0.7 ± 0.2          |
| collagen type III α1 mRNA <sup>†</sup>                                  | 1.0 ± 0.3 | 0.8 ± 0.3  | 0.4 ± 0.1          | 0.4 ± 0.2          |
| Collagen (µg/mg tissue)                                                 | 1.4 ± 0.1 | 0.7 ± 0.1* | 1.1 ± 0.1          | not done           |
| n                                                                       | 2-4       | 4-6        | 4-6                | 4-6                |

(fibroblasts (2.5x10<sup>5</sup>) were cultured for 24h with culture medium only or a 50% macrophage or IL-4-treated macrophage (M(IL4)) conditioned medium; #, fold change compared to culture medium only that was normalized to 1 in each experiment; male *Rag1*<sup>-/-</sup> mice were given 1x10<sup>6</sup> hM(IL4)s either intraperitoneally (ip.) or by intravenous injection (iv.) and 48h later received dinitrobenzene sulphonic acid (DNBS; 5mg intra-rectally) and on necropsy 72h later portions of colon were excised for qPCR and collagen measurement; †, data are fold change relative to control that was normalized to 1; \*p<0.05 compared to culture medium only or control).

**Supplementary Table 2:** Characteristics of patients with IBD from whom blood monocytes were obtained

| <b>Disease</b> | <b>State</b> | <b>Sex</b> | <b>Age</b> | <b>Location</b> | <b>Smoker</b>  | <b>Diagnosis year</b> |
|----------------|--------------|------------|------------|-----------------|----------------|-----------------------|
| CD             | Active       | M          | 46         | Unknown         | Unknown        | Unknown               |
| CD             | Active       | M          | 35         | Unknown         | Unknown        | Unknown               |
| CD             | Active       | F          | 54         | Ileocolonic     | Current Smoker | 2016                  |
| CD             | Active       | F          | 62         | Colonic         | Current Smoker | 1998                  |
| CD             | Active       | F          | 40         | Ileal           | Non-smoker     | 2006                  |
| CD             | Active       | M          | 43         | Colonic         | Non-smoker     | 2017                  |
| CD             | Active       | M          | 46         | Unknown         | Non-smoker     | 2008                  |
| CD             | Active       | M          | 61         | Ileocolonic     | Non-smoker     | 2003                  |
| CD             | Active       | F          | 23         | Unknown         | Non-smoker     | 2012                  |
| CD             | Active       | M          | 67         | Colonic         | Unknown        | 2017                  |
| CD             | Active       | M          | 53         | Unknown         | Non-smoker     | 2012                  |
| CD             | Active       | M          | 59         | Ileocolonic     | Unknown        | 1986                  |
| CD             | Inactive     | F          | 46         | Colonic         | Non-smoker     | 2012                  |
| CD             | Inactive     | F          | 62         | Unknown         | Non-smoker     | 2010                  |
| CD             | Inactive     | M          | 32         | Unknown         | Unknown        | Unknown               |
| CD             | Inactive     | M          | 58         | Unknown         | Unknown        | 1977                  |
| CD             | Inactive     | M          | 65         | Colonic         | Ex smoker      | 2008                  |
| CD             | Inactive     | F          | 20         | Ileocolonic     | Non-smoker     | 2010                  |
| CD             | Inactive     | M          | 56         | Unknown         | Unknown        | Unknown               |
| CD             | Inactive     | F          | 27         | Ileocolonic     | Non-smoker     | 2015                  |
| CD             | Inactive     | F          | 34         | Colonic         | Unknown        | 2007                  |
| UC             | Active       | F          | 72         | Unknown         | Non-smoker     | 2017                  |
| UC             | Active       | F          | 23         | Unknown         | Non-smoker     | 2017                  |
| UC             | Active       | M          | 32         | Left sided      | Non-smoker     | 2011                  |
| UC             | Active       | M          | 31         | Pancolitis      | Ex smoker      | 2013                  |
| UC             | Active       | F          | 27         | Unknown         | Non-smoker     | Unknown               |
| UC             | Active       | F          | 58         | Unknown         | Ex smoker      | 2013                  |
| UC             | Inactive     | M          | 27         | Left sided      | Unknown        | Unknown               |
| UC             | Inactive     | M          | 65         | Pancolitis      | Ex smoker      | 1979                  |
| UC             | Inactive     | F          | 71         | Unknown         | Ex smoker      | 2016                  |
| UC             | Inactive     | M          | 87         | Left sided      | Ex smoker      | 1998                  |
| UC             | Inactive     | F          | 68         | Ileocolonic     | Ex smoker      | 2012                  |
| UC             | Inactive     | F          | 38         | Left sided      | Non-smoker     | Unknown               |

(CD, Crohn's disease; F, female; M, male; UC, ulcerative colitis)

**Supplementary Table 3:** Sequences of qPCR primers used to assess human and mouse gene mRNA

| <b>Human</b>  |                                     |                    |                        |                       |
|---------------|-------------------------------------|--------------------|------------------------|-----------------------|
| <b>Gene</b>   | <b>Name</b>                         | <b>Accession #</b> | <b>Forward</b>         | <b>Reverse</b>        |
| RN18S5        | 18s                                 | NR_003286.2        | ATGGCCGTTCTTAGTTGGTG   | CGCTGAGCCAGTCAGTGTAG  |
| CD14          | CD14                                | NR_003286.2        | GCCGCTGTGTAGGAAAGAAG   | GCTGAGGTTCGGAGAAGTTG  |
| TGF $\beta$   | Transforming growth factor- $\beta$ | NM_000660.7        | GGAAATTGAGGGCTTTCGCC   | CGGTAGTGAACCCGTTGATGT |
| MRC1 (CD206)  | Mannose receptor                    | NM_002438.3        | GGCGGTGACCTCACAAGTAT   | ACGAAGCCATTTGGTAAACG  |
| CCL18         | CCL18                               | NR_003286.2        | CCCCAAGCCAGGTGTCATCCTC | GGGCCATTGCCCTGGCTCAG  |
| ACTA2         | $\alpha$ -smooth muscle actin       | NM_001141945.2     | TATCCCCGGGACTAAGACGG   | CACCATCACCCCTGATGTC   |
| P4HA1         | Prolyl-4-hydroxylase                | NM_000917.3        | CCGAGCTACAGTACATGACCC  | TGGCTCATCTTCCGTGCAA   |
| <b>Mouse</b>  |                                     |                    |                        |                       |
| <b>Gene</b>   | <b>Name</b>                         | <b>Accession #</b> | <b>Forward</b>         | <b>Reverse</b>        |
| <i>P4hal</i>  | Prolyl-4-hydroxylase                | NM_011030.2        | CTGAGGCGAGCCACCATTTC   | CAGACAGCCAAGCACTTTTGC |
| <i>Acta2</i>  | $\alpha$ -smooth muscle actin       | NM_007392.2        | CAGCCAGTCGCTGTCAGGAACC | ACCAGCGAAGCCGGCCTTACA |
| <i>Col3a1</i> | Collagen Type III, $\alpha$ I       | NM_009930.2        | GTCCGCCTGGTCCTCAGGGT   | TGCCAGGAGCACCCTGGGT   |
